1 Title

2 Label-independent flow cytometry and unsupervised neural network method for de novo clustering  
3 of cell populations

4 Authors

5 Robert Peuß<sup>1,†</sup>, Andrew C. Box<sup>1,†,\*</sup>, Alice Accorsi<sup>1,2,†</sup>, Christopher Wood<sup>1</sup>, Alejandro Sánchez  
6 Alvarado<sup>1,2,#</sup>, & Nicolas Rohner<sup>1,3,#</sup>

7 †These authors contributed equally to this study

8 #These authors share senior authorship

9 \*Author for correspondence: Andrew C. Box ([acb@stowers.org](mailto:acb@stowers.org))

10

11 Affiliation

12 <sup>1</sup>Stowers Institute for Medical Research, 1000 East 50th Street, Kansas City, MO 64110, United  
13 States

14 <sup>2</sup>Howard Hughes Medical Institute, Stowers Institute for Medical Research, 1000 East 50th Street,  
15 Kansas City, MO 64110, United States

16 <sup>3</sup>Department of Molecular & Integrative Physiology, KU Medical Center, Kansas City, KS 66160,  
17 United States.

18

19 Abstract

20 Image-based cell classification has become a common tool to identify phenotypic changes in cells.  
21 To date, these approaches are limited to model organisms with species-specific reagents available  
22 for cell phenotype identification, clustering and neural network training. Here we present Image3C  
23 (Image-Cytometry Cell Classification), a tool that enables cell clustering based on their intrinsic  
24 phenotypic features, combining image-based flowcytometry with cell cluster analysis and neural  
25 network integration. Using Image3C we recapitulated zebrafish hematopoietic cell lineages and  
26 identified cells with specific functions (phagocytes), whose abundance is comparable between  
27 treatments. To test Image3C versatility, we performed the same analyses on hemocytes of the snail  
28 *Pomacea canaliculata* obtaining results consistent with those collected by classical histochemical  
29 approaches. The convolutional neural network, then, uses Image3C clusters and image-based  
30 flowcytometry data to analyze large experimental datasets in an unsupervised high-throughput  
31 fashion. This tool will allow analysis of cell population composition on any species of interest.

32

33 Main text

34 Modern technologies used to analyze individual cells and subsequently cluster them based on  
35 morphology, cell surface protein expression or transcriptome similarities are powerful methods for  
36 high-throughput analyses of biological processes at single cell-resolution. Recent advances in  
37 image-based cell profiling and single cell RNA-Seq (scRNA-Seq) allow quantification of  
38 phenotypic differences in cell populations and comparisons of cell type composition between  
39 samples<sup>1</sup>. While studies that use traditional research organisms (*e.g.* mouse, rat, human or fruit fly)  
40 benefit from these methods due to the availability of mature genomic platforms and established  
41 antibody libraries, the lack of such resources in less traditional organisms prevents extensive use  
42 of single-cell based methods to interrogate their biology. In these cases, classical histochemical  
43 methods are often used to identify and characterize specific cells, but the quantification analysis  
44 of specific cell types can be affected by both observer bias<sup>2</sup> and a dearth of quantitative frameworks  
45 for making determination of cell classes.

46 Automated classification of cells using neural networks has become a promising approach for  
47 high-throughput cell analysis<sup>3-7</sup>. Critical for such analysis is the definition of the phenotype that is  
48 used to cluster cells. To date, automated clustering and classification techniques required existing  
49 knowledge about the organisms or cell type of interest, the availability of cell specific reagents  
50 (such as antibodies) or extremely sophisticated equipment not broadly distributed (*e.g.* single cell  
51 sequencing technology)<sup>3-8</sup>. To extend cellular composition analysis to any research organisms  
52 without the need for previous knowledge about the cell population of interest or for species-  
53 specific reagents at any step of the study, we developed Image3C. Our method analyzes, visualizes  
54 and quantifies the composition of cell populations by using cell-intrinsic features and generic, non-  
55 species-specific fluorescent probes (*e.g.*, Draq5 or other vital dyes), thus eliminating observer bias

56 and increasing the analyzed sample size. Image3C is an extremely versatile method that is virtually  
57 applicable to any research organism from which dissociated cells can be obtained. By taking  
58 advantage of morphology and/or function-related fluorescent probes, Image3C can analyze single  
59 cell suspensions derived from any experimental design and identify different constituent cell  
60 populations. In addition, we employed a convolutional neural network that uses Image3C defined  
61 clusters as training sets and image-based flow cytometry data for unsupervised analysis of cellular  
62 composition in large experimental datasets. In summary, Image3C combines modern high-  
63 throughput data acquisition through image-based flow cytometry, advanced clustering analysis,  
64 statistics to compare the cell composition between different samples and can be used in  
65 combination with a neural network component to finely determine changes in the composition of  
66 cell population across multiple samples.

67 The general workflow of Image3C is presented in Fig. 1 using hematopoietic tissue from the  
68 zebrafish, *Danio rerio*. We tested whether Image3C can identify homogeneous and biologically  
69 meaningful clusters of hematopoietic cells by analyzing only intrinsic morphological and  
70 fluorescent features, such as cell and nuclear size, shape, darkfield signal (side scatter, SSC) and  
71 texture. Each sample obtained from adult fish was stained and run on the ImageStream<sup>®</sup>X Mark II  
72 (Amnis Millipore Sigma) and individual cell images were collected (Fig. 1a) at a speed of 1,000  
73 images/sec. Feature intensities from both morphological and fluorescent features, such as cell size  
74 and nuclear size, were extracted from the cell images using IDEAS software (Amnis Millipore)  
75 (Fig. 1a, Table S1 for feature description, Supplemental Methods). The Spearman's correlation  
76 values for each pair of features were calculated using all cell events (*i.e.* cell images) of a  
77 representative sample and used to trim redundant features<sup>1</sup> (Fig. 1a). The Spearman's correlation  
78 of the mean values of remaining features were then used to identify outliers among sample

79 replicates (Fig. 1a). While morphological features do not require any normalization, fluorescence  
80 intensity features often must be transformed using a ‘logicle’ transformation (R flowCore  
81 package)<sup>9-11</sup> to improve homoscedasticity (homogeneity of variance) of distributions. Then, prior  
82 to clustering, fluorescent intensity features derived from DNA staining were normalized using the  
83 gaussNorm function from the flowStats R package<sup>10-12</sup> to align all 2N and 4N peak positions (Fig.  
84 1a). These feature processing steps must be done independently for each research organism  
85 because of the high variability between data and distributions. A final set of feature intensities was  
86 used for clustering the events using X-Shift algorithm<sup>13</sup>. Dimensionality reduction and  
87 visualization of resultant clusters and events were achieved by generating force directed layout  
88 graphs (FDL, Fig. 1b) using a combination of Vortex clustering environment<sup>13</sup> and custom R  
89 scripts, respectively (Supplemental Methods). Visualization of the cell images by cluster was done  
90 using FCS Express (version 6 Plus) and its integrated R Add Parameters Transformation feature  
91 (Fig. 1b, Supplemental Methods). Additionally, cluster feature averages (*i.e.* the mean value of  
92 each feature for each cluster) provide a deeper understanding about the morphological features  
93 that differ between cells belonging to separate clusters and the cluster distribution can be used to

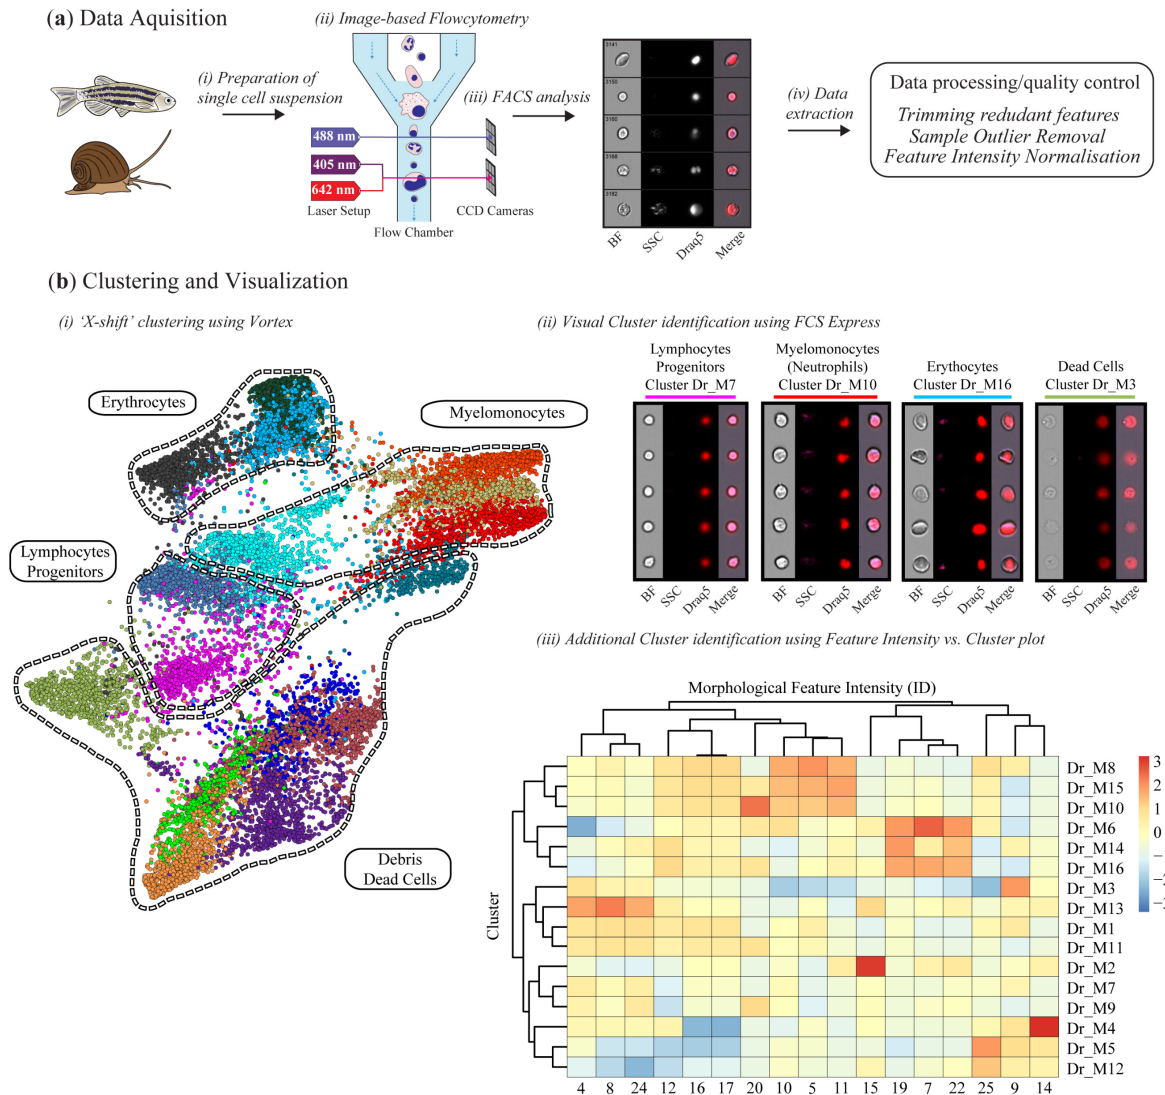

**Fig. 1** | Schematic representation of Image3C using hematopoietic tissue from zebrafish as an example for cell clustering based on morphological features. **(a)** (i) Hematopoietic tissue (or any single suspension of cells of interest) obtained from zebrafish (or any research organism) is prepared for image-based flowcytometric analyses (ii) and run on the ImageStream<sup>®</sup>X Mark II (n=8). (iii) Standard gating of nucleated events and manual out-gating of most erythrocytes using IDEAS software is followed by (iv) the extraction of intensities for intrinsic morphological and fluorescent features, normalization and quality controls. **(b)** (i) Cell images are clustered based on the intrinsic feature intensities and visualized as a force directed layout (FDL) graph. (ii) R integration in FCS Express software allows the visualization of all the cell images belonging to a specific cluster to evaluate the homogeneity of the cluster and determine phenotype/function of the cells. (iii) In addition to data visualization, Image3C provides a variety of options for integrated data plotting, such as the Spearman's correlation plot of feature intensities per cluster for identification of similarities and differences between cells in different clusters (Table S1 for details).

94 derive the most significant contribution to cluster variance from the feature set (Fig. 1b). Finally,  
 95 statistical analysis to compare cell counts per cluster between potential different treatments is  
 96 integrated in Image3C and is done using negative binomial regression (Supplemental Methods).  
 97 As seen in Fig. 1b, Image3C can distinguish between the major classes of hematopoietic cells in

98 zebrafish (see Data File 1 and 2) that were described using standard flow cytometry sorting and  
99 morphological staining approaches<sup>14</sup>. It is noteworthy that this method can clearly identify dead  
100 cells and debris (Fig. 1b). The possibility to identify and separate these events from the intact and  
101 alive cells allows to optimize experimental conditions and cell treatment protocols in order to  
102 minimize cell death and run the subsequent analysis only on the remaining events. In addition,  
103 Image3C can identify cells with outstanding morphological features, such as neutrophils from  
104 other myelomonocytes (see Fig. 1b).

105 Next, we sought to determine whether Image3C can be used to detect clusters whose relative  
106 abundance significantly changes after specific experimental treatments. We performed a standard  
107 phagocytosis assay using hematopoietic cells from zebrafish, which were stained with Draq5 and  
108 incubated with CellTrace Violet labeled *Staphylococcus aureus* (CTV-*S. aureus*) and  
109 dihydrorhodamine-123 (DHR), a reactive oxygen species that becomes fluorescent if oxidized  
110 (Supplemental Methods). The DHR was used as a proxy for cell activation to report oxidative  
111 bursting as a consequence of phagocytosis. As control, we inhibited phagocytosis through  
112 cytoskeletal impairment by CCB incubation or through incubation at lower temperature (i.e. on  
113 ice). Events collected on the ImageStream<sup>®</sup>X Mark II (Amnis Millipore Sigma) were analyzed  
114 with our pipeline and clustered in 26 distinct clusters using intensities of morphological and  
115 fluorescent features (see Table S1), such as nuclear staining, *S. aureus* phagocytosis and DHR  
116 positivity (Fig. 2a). Professional phagocytes were defined by their ability to take up CTV-*S. aureus*  
117 and induce a reactive oxygen species (ROS) response (DHR positive)<sup>15</sup>. To compare between  
118 samples incubated with CTV-*S. aureus* and the respective control samples we used the statistical  
119 analysis pipeline from Image3C, which is based on a negative binomial regression model (Fig.  
120 2b). In zebrafish, professional phagocytes are mainly granulocytes and monocytic cells and can be

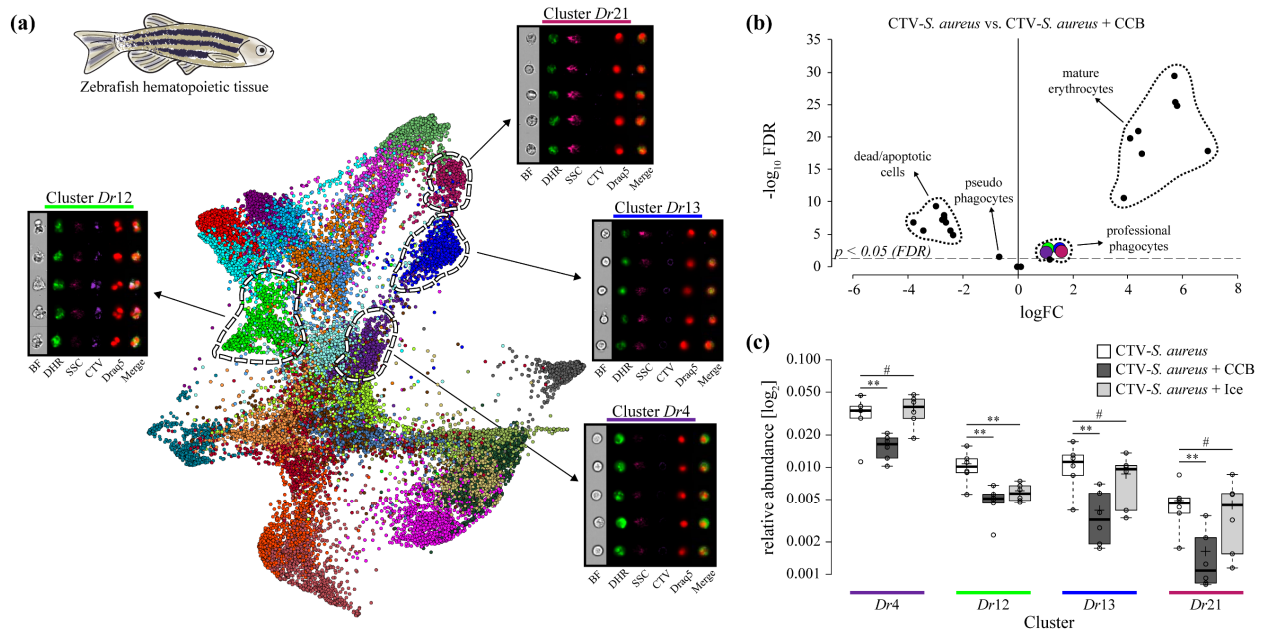

Fig. 2 | Identification of phagocytes in *D. rerio* hematopoietic cells using Image3C based on intrinsic feature intensities. (a) FDL graph of cluster data, where each color represents a unique cell cluster. Galleries of cluster containing professional phagocytes are shown. Merge represents overlay of DHR, CTV and Draq5 channels. (b) Volcano Plot illustrating comparison between treatment sample (hematopoietic cells + *CTV-S. aureus*) and CCB control sample (hematopoietic cells + *CTV-S. aureus* + 0.08 mg/mL CCB). The log fold change (logFC) is plotted in relation to the FDR corrected p-value ( $-\log_{10}$ ) of each individual cluster calculated with negative binomial regression model. Clusters containing professional phagocytes are highlighted in the respective color as presented in (a). (c) Box plot of relative abundances of cells within cluster containing professional phagocytes in treatment sample (hematopoietic cells + *CTV-S. aureus*), CCB control sample (hematopoietic cells + *CTV-S. aureus* + 0.08 mg/mL CCB) and ice control sample (hematopoietic cells + *CTV-S. aureus* incubated on ice). Statistically significant differences are calculated using the negative binomial regression model between the treatment and the control samples (Supplemental Methods). \*\* indicates  $p \leq 0.01$  and # indicates not significantly different after FDR ( $n=6$ ).

121 discriminated from each other based on morphological differences (*i.e.* cell size, granularity and  
 122 nuclear shape)<sup>16</sup>. By combining the statistical analyses, the visual inspection of the cell galleries  
 123 (Data File S3) and the intensity of morphological and fluorescent intensities (Data File S2), we  
 124 identified 4 clusters of professional phagocytes: granulocytes within cluster *Dr4*, *Dr12* and *Dr13*  
 125 and monocytic cells in cluster *Dr21* (Fig. 2a, 2b). The morphology of cells in cluster *Dr12* is  
 126 characteristic of phagocytic neutrophils (Fig. 2a) that become adhesive and produce extracellular  
 127 traps upon recognition of bacterial antigens<sup>17</sup>. Overall relative abundance of professional  
 128 phagocytes is 5-10% (Fig. 2c), which is in line with previous studies that estimated the number of



129 professional phagocytes in hematopoietic tissue of adult zebrafish using classical morphological  
130 approaches<sup>16</sup>.

131 It is interesting to note that CCB selectively affects cell viability based on cell identity (Fig. 2b).  
132 We found all erythrocyte containing clusters had a significantly higher cell count in the CTV-*S.*  
133 *aureus* samples when compared to the CTV-*S. aureus* + CCB controls (Fig. 2b). Cluster analysis  
134 revealed that erythrocytes are almost absent in samples incubated with CCB (Data File S2), while  
135 there is a significant increase of dead and apoptotic cells (Fig. 2b, Table S2). Both outcomes are  
136 likely due to reduced cell viability of erythrocytes upon CCB incubation. Moreover, we excluded  
137 the possibility of higher cell death in the professional phagocytes upon CCB incubation, since we  
138 found here pseudo-phagocytes (phagocytes with DHR response but no internalized CTV-*S.*  
139 *aureus*) to be significantly more abundant (Fig. 2b, Table S2).

140 Next, we inhibited phagocytosis by incubating the hematopoietic cells on ice (Supplemental  
141 Methods) and compared the effectiveness of inhibition with the CCB control (Fig. 2c, Table S3).  
142 We found that temperature inhibition of phagocytosis only affects adhesive neutrophils (cluster  
143 *Dr12*), probably through the inhibition of adhesion, while CCB effectively blocks phagocytosis in  
144 all professional phagocytes in zebrafish hematopoietic tissue (Fig. 2c).

145 To test the versatility of Image3C, we repeated the experiments using hemolymph samples from  
146 the emerging invertebrate model *Pomacea canaliculata*<sup>18</sup>. For morphological examination of the  
147 cellular composition of the hemolymph, we stained the tissue with Draq5 (DNA dye) and run on  
148 the ImageStream<sup>®</sup>X Mark II (Amnis Millipore Sigma) (Supplemental Methods). From the cell  
149 images, Image3C analyzed 15 morphological and 10 fluorescent features and identified 9 cell  
150 clusters (Fig. 3a). Two of these clusters are constituted by cell doublets, debris and dead cells  
151 (clusters *Pc5* and *Pc8*). (Fig. 3c). Concerning the other clusters, we grouped them into 2 main

152 categories based on both cell images and previous data<sup>18</sup> (Data File S4). The first category includes  
153 small blast-like cells (cluster *Pc4*) and intermediate cells (clusters *Pc2* and *Pc3*) with high nuclear-  
154 cytoplasmic ratio. These cells morphologically resemble the Group I hemocytes previously  
155 described using a classical morphological approach<sup>18</sup>. The second category is constituted by larger  
156 cells with lower nuclear-cytoplasmic ratio and abundant membrane protrusions (clusters *Pc1*, *Pc6*,  
157 *Pc7* and *Pc9*). Likely, these cells correspond to the previously described Group II hemocytes that  
158 include both granular and agranular cells<sup>18</sup>. To identify which of these clusters are enriched with  
159 granular cells, the intensities of the morphological features related to cytoplasm texture provided  
160 by Image3C were compared between the clusters of this category (Fig. 3b, Data File S4). Cluster  
161 *Pc6* was identified as the one containing the granular hemocytes. The clusters obtained by  
162 Image3C, not only were homogeneous and biologically meaningful, but were also consistent with  
163 published *P. canaliculata* hemocyte classification obtained by classical morphological methods<sup>18</sup>.  
164 Such remarkable consistency has been observed in terms of identified cell morphologies and their  
165 relative abundance in the population of circulating hemocytes (Fig. 3c, Data File S4). For example,  
166 the relative abundance of the previously reported small blast-like cell is 14.0% a value almost  
167 identical to the corresponding cluster *Pc4* of 13.8%. Similarly, the category of larger hemocytes,  
168 or Group II hemocytes represents 80.4% of the circulating cells as measured by traditional  
169 morphological methods<sup>18</sup>, while clusters *Pc1*, *Pc6*, *Pc7* and *Pc9* represent 72.4% of the events  
170 analyzed with Image3C. A sub-set of these cells are the granular cells (cluster *Pc6*), which  
171 correspond to 7.7% of all hemocytes by classical histological methods<sup>18</sup> and 8.9% by Image3C.  
172 The intermediate cells (clusters *Pc2* and *Pc3*) are less well represented in both approaches, with a

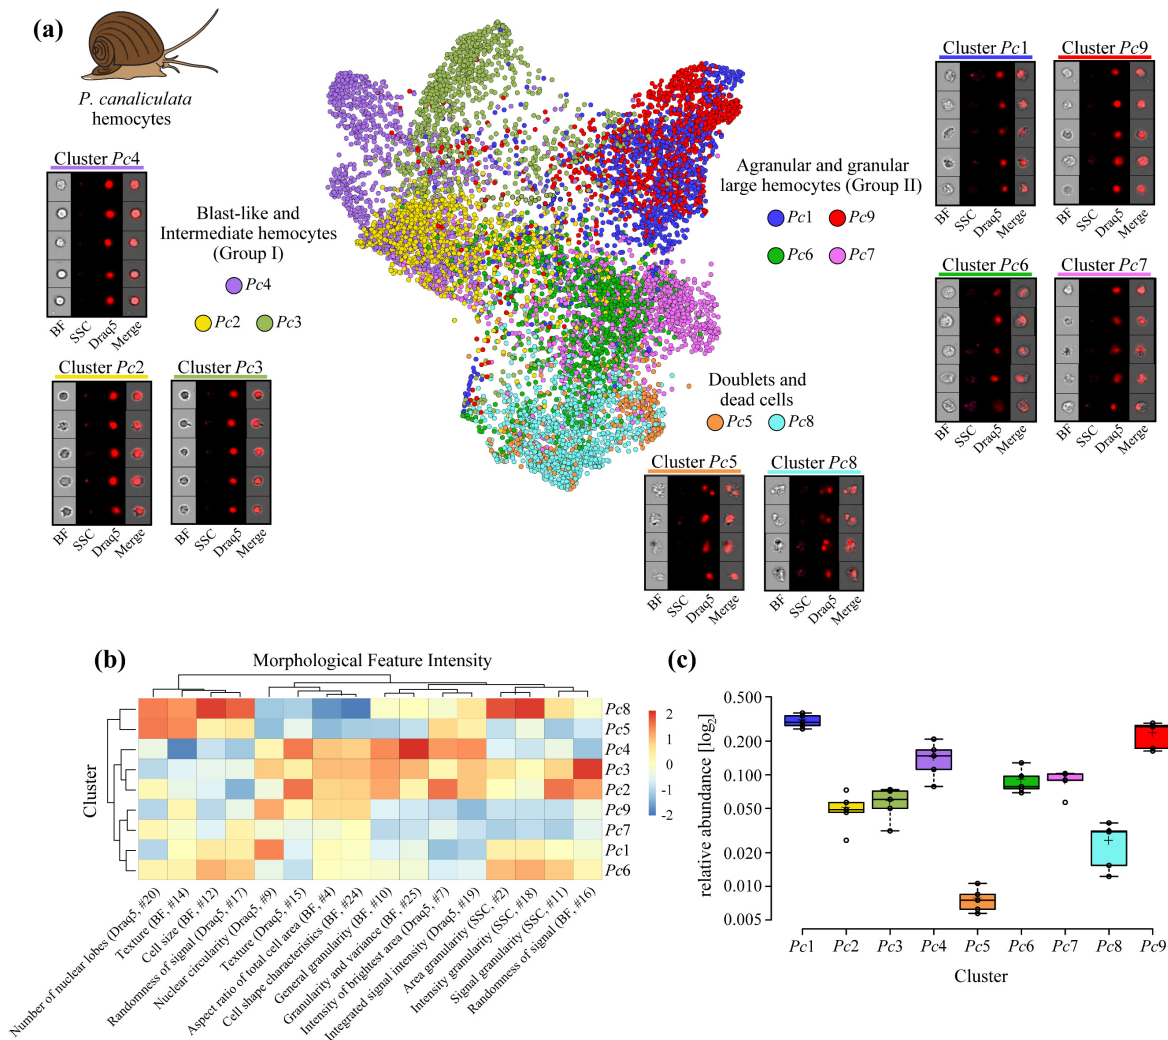

**Fig. 3 |** Analysis of *P. canaliculata* hemocyte population using the Image3C pipeline based only on intrinsic morphological features of the cells. **(a)** FDL graph is used to visualize the 9 identified clusters. Each color represents a unique cell cluster and representative images (galleries) of the cells included in each cluster are shown. Merge represents the overlay of brightfield (BF), side scatter signal (SSC) and Draq5 signal. **(b)** The Spearman's correlation plot of morphological feature intensities per cluster allows the comparison of specific morphological aspects, such as granularity, between cells belonging to different clusters (Table S1 for details). **(c)** Box plot of relative abundance of events within each cluster following the same color-code used in Fig. 2a. Clusters Pc5 and Pc8, constituted by duplets and dead cells, are those with the lowest number of events, validating the protocol used to prepare these samples ( $n=5$ ).

173 relative difference in abundance of 5.6% versus 10.6% of the manually and Image3C analyzed  
 174 events, respectively. However, such difference is likely best explained by the remarkable  
 175 difference in both, the number of cells and number of features considered for the analyses. Only a  
 176 few hundred hemocytes were ocularly analyzed based on cell diameter and nuclear-cytoplasmic  
 177 ratio using traditional histological methods<sup>18</sup>, while the automated pipeline used in this study

178 analyzed 10,000 nucleated events for each sample considering 25 cell intrinsic features for each  
179 cell. Hence, Image3C represents an unprecedented increase in the accuracy of hemocyte type  
180 identification over traditional histological methods.

181 In addition, we performed the same phagocytosis experiment, already done for hematopoietic  
182 cells from zebrafish, with hemocytes from *P. canaliculata* (Data File S2, S5, Table S4, S5). Here,  
183 we inhibited phagocytosis using either EDTA treatment or low temperature (i.e. incubation on  
184 ice). We identified two professional phagocyte clusters (cluster 27430 and 27442, Data File S5),  
185 both constituted by large hemocytes (Group II), but with a different DHR signal intensity (ROS  
186 response) upon bacteria exposure (cluster 27430 high DHR signal, cluster 27442 low DHR signal,  
187 Data File S2 and S5). Similar to the CCB inhibition control in the zebrafish phagocytosis  
188 experiment, EDTA is more effective in inhibiting phagocytosis than low temperature since both  
189 professional phagocytic clusters (cluster 27430 and 27442) contain significantly higher numbers  
190 of cells in the phagocytosis treatment compared to the EDTA control (Table S4). In the ice control  
191 sample, however, only cluster 27442 has a significantly higher relative abundance of professional  
192 phagocytes compared to the phagocytosis treatment sample (Table S5).

193 The data analysis with Image3C clearly highlighted that the classical phagocytic inhibitors,  
194 CCB or EDTA, commonly used in controls for phagocytosis experiments, result in a drastic change  
195 of cell morphology, a consequence not easily detectable by other methods and often overlooked.  
196 In the present work, these changes significantly modified the overall cell cluster number and  
197 distribution, and this must be taken into consideration in any study of morphological features of  
198 cells with phagocytosis properties. Furthermore, when determining differences between

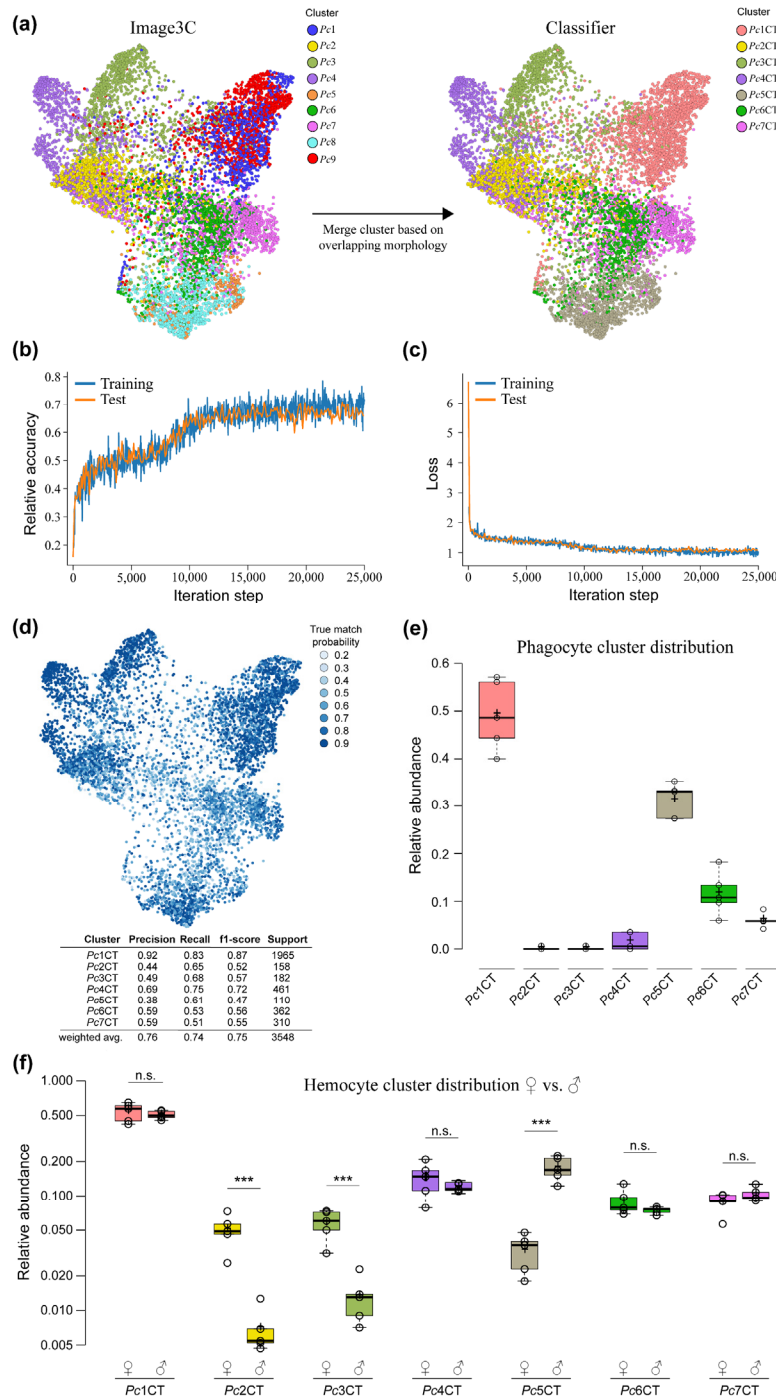

**Fig. 4 |** The combination of convolutional neural network with Image3C enables the unsupervised analysis of large experimental datasets. **(a)** Cluster structure from *P. canaliculata* as determined by Image3C was simplified to correct for over clustering (Supplemental Information for details) by combining strongly overlapping clusters (Pc1 and Pc9 combined to Pc1CT; Pc5 and Pc8 combined to Pc5CT). **(b)** Cell images from within resulting clusters were used for neural network training and **(c)** loss calculation for 25,000 iterations. **(d)** The true match probability (probability that trained classifier-assigned cluster matches original Image3C cluster) is given for each cell from the original dataset. The detailed precision score for each cluster together with the weighted average (correcting for support) is given below. **(e)** Distribution of snail phagocytes among the clusters of hemocytes defined by morphological features. **(f)** Comparison of the composition of the hemocyte population between female and male.

199 experimental treatments, Image3C necessarily combines images and data from all the treatments  
 200 and re-clusters the cells (Supplemental Methods). Therefore, experiments meant to classify and  
 201 analyze only innate cell morphologies present in a tissue should be carried out separately from  
 202 experiments where one or more treatments are likely to significantly affect cell morphology in an

203 unanticipated manner (e.g. CCB or EDTA incubation). This would prevent treatment effects being  
204 conflated with innate morphology differences among unperturbed cell types.

205 To overcome this potential confounding factor for large scale experiments and allow a direct  
206 comparison between same clusters over multiple samples, we designed a convolutional neural  
207 network<sup>19</sup> based on the architecture of DenseNet<sup>20</sup> that is able to use Imagestream image files and  
208 Image3C cluster information to objectively assign cells to clusters that were previously defined  
209 through the Image3C pipeline (Fig. 4). Here, we used the clusters of naïve *P. canaliculata*  
210 hemocytes generated by Image3C (Fig. 3a) for setting up the neural network and the first step was  
211 to combine Image3C cluster that strongly overlap with one another (Fig. 4a) to correct for  
212 clustering and for increase accuracy of the classifier. We used 80% of the cells obtained in the  
213 original *P. canaliculata* dataset together with the classifier cluster information to train the classifier  
214 with 25,000 iterations (Fig. 4b, c, Supplemental Information for details). After each iteration, 10%  
215 of the cells of the original *P. canaliculata* dataset was used to test the classifier (Fig. 4b, c). The  
216 relative accuracy for training and testing were determined by scoring numbers of cells whose  
217 cluster ID assigned by the classifier matched the cluster ID of the original dataset in relation to the  
218 overall cell number used for training and testing, respectively. The network loss was defined by  
219 the softmax of the cross entropy<sup>21</sup> between the final output and the one-hot-encoded image labels.  
220 Training was performed using the Adam Optimizer<sup>22</sup> with a decaying learning rate starting at 0.001  
221 and decreasing by 1% each step (Fig. 4b, c). To avoid the network memorizing the training set, L2  
222 regularization was applied to the weights. The remaining 10% of the original dataset was used to  
223 calculate the precision of the trained classifier (Fig 4d). While clusters with higher support  
224 numbers obtained higher precision scores, the weighted average precision score (precision average  
225 score across clusters controlling for support numbers) of 0.74 is relatively high considering the

226 complexity of the phenotype (BF, darkfield and Draq5 images) and comparable to other studies  
227 using machine learning for cell classification<sup>5</sup>. The true probability match for each cell (probability  
228 for each presented cell given from classifier to match the original Image3C cluster) demonstrates  
229 that lower true probability matches occur where cluster strongly overlap (Fig. 4d) potentially  
230 giving us information about cell phenotypes that are intermediate between clusters.

231 To test the efficiency of this pipeline, we extracted the images of the phagocytes obtained with  
232 the previous phagocytosis experiment performed on snail hemolymph and determined to which  
233 clusters these hemocytes belong through the neural network. We found that 49%, 12% and 6% of  
234 the phagocytes belong to cluster *Pc1CT*, *Pc6CT* and *Pc7CT*, respectively (Fig. 4e). These results  
235 confirmed the previously published data where the hemocytes able to phagocytize were manually  
236 assigned to Group II hemocytes through classical morphological stainings<sup>18</sup>. Only 2% of the  
237 phagocytes were clustered in the Group I hemocytes, here represented by cluster *Pc2CT*, *Pc3CT*  
238 and *Pc4CT*, while the remaining 31% were assigned by the neural network to the cluster *Pc5CT*,  
239 constituted by doublets and dead cells (Fig. 4e). This data can be explained by the fact that *in-vitro*  
240 phagocytosis triggers microaggregate formation (hemocyte – hemocyte adhesion) in invertebrate  
241 hemocytes that resemble the nodule formation observed *in-vivo*<sup>23</sup>.

242 In an additional test to determine the adaptability of the trained neural network to new datasets,  
243 we collected hemocytes from male snails. We stained the cells with Draq5 and recorded BF, SSC  
244 and nuclei images from 10,000 cells on the ImageStream<sup>®</sup>X Mark II (Amnis Millipore Sigma) as  
245 described before. We extracted the images of the cells and we used our neural network to determine  
246 the relative abundance of hemocytes from males in the 7 clusters used for the training (see Fig 4a).  
247 The comparison between female and male hemocyte composition revealed that the only clusters  
248 significantly different in terms of relative abundance are *Pc2CT* and *Pc3CT*, defined as Group I

249 intermediate hemocytes and *Pc5CT* (Fig. 4f). The latter one, comprehending dead cells and  
250 doublets, might be explained by the sample preparation and data collection variability, while more  
251 interesting is the difference observed in the other two clusters. In the previously published data,  
252 no differences were detected through manual classification and counting between females and  
253 males hemocytes composition using a classical morphological approach<sup>18</sup>. The unsupervised and  
254 high-throughput analysis presented here, instead, allowed us to determine that both subpopulations  
255 of intermediate cells defined by the Image3C tool are significantly less represented in the male  
256 animals (*Pc2CT*: 5% and 1% in female and male, respectively; *Pc3CT*: 6% and 1%, respectively)  
257 (Fig. 4f). While the biological meaning of this difference is not going to be further investigated in  
258 this paper, we would like to highlight the power of our tool compared to a more classical approach  
259 to determine and analyze the composition of cell population.

260 These experiments demonstrate that our new tool Image3C in combination with the presented  
261 convolutional classifier is capable of analyzing large experimental datasets and identifying  
262 significances with small effect sizes independently from observer biases and previous knowledge  
263 about the effect of the treatment on the cell morphology.

264 In summary, we have developed a powerful new method to analyze the composition of any cell  
265 population obtained from any research organism of interest at single cell resolution without the  
266 need for species-specific reagents such as fluorescently tagged antibodies (multicolor  
267 immunophenotyping). We showed how Image3C can cluster cell populations based on  
268 morphology and/or function and highlight changes in the cell population composition due to  
269 experimental treatments. Furthermore, in combination with the convolutional neural network  
270 trained on Image3C clusters, we are capable of unsupervised, bias-free and high-throughput  
271 analysis of large experimental datasets with a precise comparison of relative abundance of cells in



272 the same cluster across different samples. This tool is extremely versatile and can be applied to  
273 any cell population of interest and included in any experimental design. In addition, given the  
274 recent advancement in image-based flow cytometry that enables image capturing together with  
275 cell sorting<sup>24</sup>, a scRNA-Seq approach in combination with the Image3C pipeline would enable the  
276 simultaneous analysis of both phenotypic and genetic properties of a cell population at single cell  
277 resolution. Image3C is freely available from the Github repository<sup>25</sup>.

278

### 279 Acknowledgements

280 We kindly acknowledge Hua Li for her assistance on the statistical analysis and we also thank the  
281 Laboratory Animal Services and the Aquatics Facility at the Stowers Institute for Medical  
282 Research for animal husbandry. This work was supported by institutional funding to ACB, CW,  
283 ASA and NR. ASA is a Howard Hughes Medical Institute Investigator. RP was supported by a  
284 grant from the Deutsche Forschungsgemeinschaft (PE 2807/1-1). AA was supported by the  
285 Emerging Models grant from the Society for Developmental Biology (SDB) and the postdoctoral  
286 fellowship from the American Association of Anatomists (AAA).

287

### 288 Author Contributions

289 RP, ACB and AA conceived and designed the study with input from ASA and NR. RP performed  
290 *D. rerio* experiments. AA performed *P. canaliculata* experiments. ACB conceived and wrote the  
291 Image3C pipeline and associated R-scripts. CW designed and optimized the convolutional neural  
292 network. RP, ACB, AA and CW analyzed and interpreted the data. RP, ACB and AA wrote the  
293 paper. All authors read and edited the paper.

294

295 Data availability statement

296 All original data underlying this manuscript can be accessed from the Stowers Original Data  
297 Repository at <http://www.stowers.org/research/publications/libpb-1390>. Image3C code and  
298 description is available at <https://github.com/stowersinstitute/LIBPB-1390-Image3C>.

299

300 References

- 301 1 Caicedo, J. C. *et al.* Data-analysis strategies for image-based cell profiling. *Nature*  
302 *methods* **14**, 849-863, doi:10.1038/nmeth.4397 (2017).
- 303 2 van der Meer, W., Scott, C. S. & de Keijzer, M. H. Automated flagging influences the  
304 inconsistency and bias of band cell and atypical lymphocyte morphological differentials.  
305 *Clin Chem Lab Med* **42**, 371-377, doi:10.1515/CCLM.2004.066 (2004).
- 306 3 Eulenberg, P. *et al.* Reconstructing cell cycle and disease progression using deep  
307 learning. *Nature communications* **8**, 463, doi:10.1038/s41467-017-00623-3 (2017).
- 308 4 Kobayashi, H. *et al.* Label-free detection of cellular drug responses by high-throughput  
309 bright-field imaging and machine learning. *Scientific reports* **7**, 12454,  
310 doi:10.1038/s41598-017-12378-4 (2017).
- 311 5 Blasi, T. *et al.* Label-free cell cycle analysis for high-throughput imaging flow cytometry.  
312 *Nature communications* **7**, 10256, doi:10.1038/ncomms10256 (2016).
- 313 6 Nassar, M. *et al.* Label-Free Identification of White Blood Cells Using Machine Learning.  
314 *Cytometry. Part A : the journal of the International Society for Analytical Cytology* **95**, 836-  
315 842, doi:10.1002/cyto.a.23794 (2019).
- 316 7 Lei, C. *et al.* High-throughput imaging flow cytometry by optofluidic time-stretch  
317 microscopy. *Nature protocols* **13**, 1603-1631, doi:10.1038/s41596-018-0008-7 (2018).
- 318 8 Baron, C. S. *et al.* Cell Type Purification by Single-Cell Transcriptome-Trained Sorting.  
319 *Cell* **179**, 527-542 e519, doi:10.1016/j.cell.2019.08.006 (2019).
- 320 9 Hahne, F. *et al.* flowCore: a Bioconductor package for high throughput flow cytometry.  
321 *BMC bioinformatics* **10**, 106, doi:10.1186/1471-2105-10-106 (2009).
- 322 10 Huber, W. *et al.* Orchestrating high-throughput genomic analysis with Bioconductor.  
323 *Nature methods* **12**, 115-121, doi:10.1038/nmeth.3252 (2015).
- 324 11 R: A language and environment for statistical computing (R Foundation for Statistical  
325 Computing, Vienna, Austria, 2014).
- 326 12 Hahne, F. *et al.* Per-channel basis normalization methods for flow cytometry data.  
327 *Cytometry. Part A : the journal of the International Society for Analytical Cytology* **77**, 121-  
328 131, doi:10.1002/cyto.a.20823 (2010).
- 329 13 Samusik, N., Good, Z., Spitzer, M. H., Davis, K. L. & Nolan, G. P. Automated mapping of  
330 phenotype space with single-cell data. *Nature methods* **13**, 493-496,  
331 doi:10.1038/nmeth.3863 (2016).
- 332 14 Traver, D. *et al.* Transplantation and in vivo imaging of multilineage engraftment in  
333 zebrafish bloodless mutants. *Nature Immunology* **4**, 1238-1246, doi:10.1038/ni1007  
334 (2003).
- 335 15 Rabinovitch, M. Professional and non-professional phagocytes: an introduction. *Trends in*  
336 *Cell Biology* **5**, 85-87, doi:10.1016/s0962-8924(00)88955-2 (1995).

- 337 16 Wittamer, V., Bertrand, J. Y., Gutschow, P. W. & Traver, D. Characterization of the  
338 mononuclear phagocyte system in zebrafish. *Blood* **117**, 7126-7135, doi:10.1182/blood-  
339 2010-11-321448 (2011).
- 340 17 Palic, D., Andreasen, C. B., Ostojic, J., Tell, R. M. & Roth, J. A. Zebrafish (Danio rerio)  
341 whole kidney assays to measure neutrophil extracellular trap release and degranulation  
342 of primary granules. *Journal of immunological methods* **319**, 87-97,  
343 doi:10.1016/j.jim.2006.11.003 (2007).
- 344 18 Accorsi, A., Bucci, L., de Eguileor, M., Ottaviani, E. & Malagoli, D. Comparative analysis  
345 of circulating hemocytes of the freshwater snail *Pomacea canaliculata*. *Fish & shellfish*  
346 *immunology* **34**, 1260-1268, doi:10.1016/j.fsi.2013.02.008 (2013).
- 347 19 LeCun, Y. *et al.* Backpropagation Applied to Handwritten Zip Code Recognition. *Neural*  
348 *Computation* **1**, 541-551, doi:10.1162/neco.1989.1.4.541 (1989).
- 349 20 Huang, G., Liu, Z., Maaten, L. v. d. & Weinberger, K. Q. in *2017 IEEE Conference on*  
350 *Computer Vision and Pattern Recognition (CVPR)*. 2261-2269.
- 351 21 Dahal, P. *Softmax cross entropy*, <<https://github.com/parasdahal/deepnet>> (2017).
- 352 22 Kingma, D. P. & Ba, J. L. in *3rd International Conference on Learning Representations*.  
353 (eds Yoshua Bengio & Yann LeCun).
- 354 23 Walters, D. R. Hemocytes of saturniid silkworms: Their behavior in vivo and in vitro in  
355 response to diapause, development, and injury. *Journal of Experimental Zoology* **174**,  
356 441-450, doi:10.1002/jez.1401740407 (1970).
- 357 24 Nitta, N. *et al.* Intelligent Image-Activated Cell Sorting. *Cell* **175**, 266-276 e213,  
358 doi:10.1016/j.cell.2018.08.028 (2018).
- 359 25 Stowers Institute for Medical Research. *LIBPB-1390-Image3C*,  
360 <<https://github.com/stowersinstitute/LIBPB-1390-Image3C>> (2019).

361

362 Online Supplemental Methods

363 **Collection of zebrafish whole kidney marrow (WKM)**

364 Twelve-month-old, wild type, female, adult zebrafish were euthanized with cold 500 mg/L MS-  
365 222 solution for 5 min. Kidneys were dissected as previously described<sup>1</sup> and then transferred to 40  
366 µm cell strainer with 1 mL of L-15 media containing 10% water, 10 mM HEPES and 20 U/mL  
367 Heparin (L-90). Cells were gently forced through the cell strainer with the plunger of a 3 mL  
368 disposable syringe. The strainer was washed once with 1 mL of L-90 and the resulting single cell  
369 solution was centrifuged at 500 rcf at 4 °C for 5 min. The supernatant was discarded, and the cells  
370 were resuspended in 1 mL of L-15 media containing 5 % fetal calf serum (FCS), 4 mM L-  
371 Glutamine, and 10,000 U of both Penicillin and Streptomycin (L-90 media). The cells were  
372 counted after a 1:20 dilution on the EC-800 flow cytometer (Sony) using scatter properties.

373

374 **Collection of apple snail hemocytes**

375 Specimens of the apple snail *Pomacea canaliculata* (Mollusca, Gastropoda, Ampullariidae)  
376 were maintained and bred in captivity, in a water recirculation system filled with artificial  
377 freshwater (2.7 mM CaCl<sub>2</sub>, 0.8 mM MgSO<sub>4</sub>, 1.8 mM NaHCO<sub>3</sub>, 1:5000 Remineralize Balanced  
378 Minerals in Liquid Form [Brightwell Aquatics]). The snails were fed twice a week and kept in a  
379 10:14 light:dark cycle. Wild type adult snails, 7-9 months old and with a shell size of 45-60 mm  
380 were starved for 5 days before the hemolymph collection<sup>2</sup>. If not differently specified, female  
381 snails were used for the experiments. The withdrawal was performed applying a pressure on the  
382 operculum and dropping the hemolymph directly into an ice-cold tube. The hemolymph was not  
383 pooled but the cells collected from each animal were individually analyzed. The hemolymph was  
384 immediately diluted 1:4 in Bge medium + 10% fetal bovine serum (FBS) and then centrifuged at

385 500 rcf for 5 min. The pellet of cells was resuspended in 100  $\mu$ l of Bge medium + 10% FBS. The  
386 Bge medium (also known as *Biomphalaria glabrata* embryonic cell line medium) is constituted  
387 by 22% (v/v) Schneiders's Drosophila Medium, 4.5 g/L Lactalbumin hydrolysate, 1.3 g/L  
388 Galactose, 0.02 g/L Gentamycin in MilliQ water, pH 7.0.

389

### 390 **Morphology Assay**

391 The *P. canaliculata* hemocytes were stained with 5  $\mu$ M Draq5 (Thermo Fisher Scientific) for  
392 10 min, moved to ice and subsequently run one by one on the ImageStream<sup>®</sup>X Mark II (Amnis  
393 Millipore Sigma), where 10,000 nucleated and focused events were recorded for each sample.

394 *D. rerio* hematopoietic cells obtained from 8 animals were plated at  $4 \times 10^5$  cells/well in a 96-  
395 well plate in 200  $\mu$ L of medium and incubated for 3 h at room temperature. Cells were stained  
396 with 5  $\mu$ M Draq5 (Thermo Fisher Scientific) for 10 min and subsequently run on the  
397 ImageStream<sup>®</sup>X Mark II (Amnis Millipore Sigma), where 10,000 nucleated and focused events  
398 were recorded for each sample. For Image3C analysis, erythrocytes were out-gated to increase  
399 number of immune relevant cells and to prevent over clustering. The latter is due to the fact that  
400 erythrocytes from fish are nucleated and their biconcave shape result in different morphological  
401 feature intensities only depending on their orientation during image acquisition.

402

### 403 **Phagocytosis assay**

404 For both animals, cells from a single cell suspension were plated in a 96-well plate at a  
405 concentration of  $4 \times 10^5$  cells/well in 200  $\mu$ L of medium and incubated with  $2 \times 10^7$  CTV-coupled  
406 *Staphylococcus aureus*/well (Thermo Fisher Scientific) for 3 h at room temperature. As control for  
407 phagocytosis the cells were either incubated with CTV-*S. aureus* on ice or with CTV-*S. aureus* in

408 the presence of 0.08 mg/mL cytochalasin B (CCB) for zebrafish cells or 30 mM EDTA and 10  
409 mM HEPES for apple snail cells<sup>3</sup>. After 2 h and 30 min we added 5  $\mu$ M dihydrorhodamine-123  
410 (DHR) (Thermo Fisher Scientific) to the cell suspension to stain cells positive for reactive oxygen  
411 species (ROS) production. To control for this treatment with DHR, we incubated the cells with 10  
412 ng/mL phorbol 12-myristate 13-acetate (PMA) to artificially induce ROS production. At 2 h and  
413 50 min since the beginning of incubation with CTV-*S. aureus*, all the samples were stained with 5  
414  $\mu$ M Draq5 for 10 min. After 3 h incubation with bacteria, cells were moved and stored on ice and  
415 subsequently run on the ImageStream<sup>®</sup>X Mark II (Amnis Millipore Sigma), where 10,000  
416 nucleated and focused events were recorded for each sample.

417

#### 418 **Data collection on ImageStream<sup>®</sup>X Mark II**

419 Following cell preparation, data were acquired from each sample on the ImageStream<sup>®</sup>X Mark  
420 II (Amnis Millipore Sigma) at 60x magnification, slow flow speed, using 633, 488 and 405 nm  
421 laser excitation. Bright field was acquired on channels 1 and 9. DHR (488 nm excitation) was  
422 collected on channel 2, CTV-*S. aureus* (405 nm excitation) on channel 7 and Draq5 (633 nm  
423 excitation) on channel 11. SSC was acquired on channel 6.

424

#### 425 **Data analysis**

426 Raw image data from the ImageStream<sup>®</sup>X Mark II system was compensated, background was  
427 subtracted, and features were calculated using IDEAS 6.2 software (Amnis/Millipore). Feature  
428 intensities for all cells and samples were then exported from IDEAS into FCS files for processing  
429 in R. See github repository and Table S1 for a full list of features used for each organism and a  
430 more detailed description of processing steps. Briefly, exported FCS files were processed in R<sup>4</sup> to

431 trim redundant features with high correlation values, fluorescence intensity features were  
432 transformed using the `estimateLogicle()` and `transform()` functions from the `flowCore` package<sup>5,6</sup>,  
433 and DNA intensity features were normalized to remove intensity drift between samples using the  
434 `gaussNorm` function from `flowStats`<sup>7</sup>. The processed data was exported from R<sup>4</sup> using  
435 `writeflowSet()` function in `flowCore` package<sup>5,6</sup>.

436 Data and clustering results were then imported into the Vortex clustering environment for X-  
437 shift k-nearest-neighbor clustering<sup>8</sup>. During the import into Vortex, all features were scaled to 1SD  
438 to equalize the contribution of features towards clustering. Clustering was performed in Vortex  
439 with a range of k values, typically from 5 to 150, and a final k value chosen using the ‘find elbow  
440 point for cluster number’ function in Vortex and with visual confirmation of the result that over or  
441 under-clustering did not occur. Force directed graphs of a subset of cells in each experiment’s file  
442 set were also generated in Vortex and cell coordinates in the resultant 2d space were exported  
443 along with graphml representation of the force directed graph. After clustering and generation of  
444 force directed graphs, tabular data was exported from Vortex that included a master table of every  
445 cell event and its cluster assignment and original sample ID, as well as a table of the average  
446 feature intensities for each cluster and counts of cells per cluster and per sample.

447 Clustering results were further analyzed and plotted in R<sup>4</sup> by merging all cell events and feature  
448 intensities with cluster assignments, and force directed graph X/Y coordinates. Using this merged  
449 data and the graphml file exported from Vortex, new force directed graphs were created per  
450 treatment condition using the `igraph` package<sup>9</sup> in R, statistical analysis of differences in cell counts  
451 per cluster by condition were performed using negative binomial regression of cell counts per  
452 cluster, plots of statistics results and other results generated (see github repository for details), and  
453 csv files containing cell and sample ID, feature intensities, X/Y coordinates in force directed and

454 minimum spanning tree plots were exported for each sample in the experiment set for merging  
455 results into daf files in FCS Express Plus version 6 (DeNovo software), which allowed  
456 visualization of cell images by cluster and by sub setting of regions within the force directed  
457 graphs.

458 Analysis of daf files was performed in FCS Express by opening daf files and using the “R add  
459 parameters” transformation feature to merge the csv files generated above with the daf file feature  
460 intensity and image sets. This allowed the generation of image galleries of cells within each cluster  
461 and additional analysis in the style of traditional flow cytometry (*i.e.*, gating on 2d plots of features  
462 of interest) to explore the clustering results and identify candidate clusters and populations of  
463 interest.

464 The full complement of R packages used includes flowCore<sup>5,6</sup>, flowStats<sup>7</sup>, igraph<sup>9</sup>, ggcyto<sup>10</sup>,  
465 ggridges<sup>11</sup>, ggplot2<sup>12</sup>, stringr<sup>13</sup>, hmisc<sup>14</sup> and caret<sup>15</sup>.

466

## 467 **Classifier Setup**

468

469 We used a convolutional neural network<sup>16</sup> based on the architecture of DenseNet<sup>17</sup> for image  
470 classification. Because images from the ImageStream have non-uniform sizes, each image was  
471 cropped or padded to 32x32 pixels. The neural network consists of three dense blocks that  
472 transition from input three-channel images of 32x32x3 to a final size of 4x4x87 with 87 feature  
473 maps. A dense block includes three convolution layers, each followed by leaky relu activation.  
474 The output of the dense block is a 2D convolution with a stride of 2 to provide down sampling.  
475 The final dense convolutional layer is flattened and fully connected to the output layer that is a 1d  
476 vector with a length of the number of classes for prediction. The neural network was implemented  
477 in Python using the TensorFlow platform<sup>18</sup> and the SciPy ecosystem<sup>19-21</sup>.



478 **Statistics**

479 Negative binomial regression was performed on tables of cell counts per cluster, per sample and  
480 plots were generated using R<sup>4</sup> with the edgeR<sup>22</sup> package, which was developed for RNAseq  
481 analysis, but includes generally applicable and user-friendly wrappers for regression and modeling  
482 analysis and plotting of results. When comparing females and males in Figure 4f to find differences  
483 in relative cell abundance in different cluster, a one-way ANOVA was used with subsequent FDR  
484 (Benjamini-Hochberg).

485

486 **Animal experiment statement**

487 Research and animal care were approved by the Institutional Animal Care and Use Committee  
488 (IACUC) of the Stowers Institute for Medical Research.

489

490

491

492 **References**

- 493
- 494 1 Traver, D. *et al.* Transplantation and in vivo imaging of multilineage engraftment in  
495 zebrafish bloodless mutants. *Nature immunology* **4**, 1238-1246 (2003).
- 496 2 Accorsi, A., Bucci, L., de Eguileor, M., Ottaviani, E. & Malagoli, D. Comparative analysis  
497 of circulating hemocytes of the freshwater snail *Pomacea canaliculata*. *Fish & shellfish*  
498 *immunology* **34**, 1260-1268 (2013).
- 499 3 Cueto, J. A., Rodriguez, C., Vega, I. A. & Castro-Vazquez, A. Immune Defenses of the  
500 Invasive Apple Snail *Pomacea canaliculata* (Caenogastropoda, Ampullariidae): Phagocytic  
501 Hemocytes in the Circulation and the Kidney. *PloS one* **10**, e0123964 (2015).
- 502 4 R: A language and environment for statistical computing (R Foundation for Statistical  
503 Computing, Vienna, Austria, 2014).
- 504 5 Hahne, F. *et al.* flowCore: a Bioconductor package for high throughput flow cytometry.  
505 *BMC bioinformatics* **10**, 106 (2009).
- 506 6 flowCore: flowCore: Basic structures for flow cytometry data. R package version 1.46.1.  
507 (2018).
- 508 7 flowStats: Statistical methods for the analysis of flow cytometry data. R package version  
509 3.38.0. (2018).
- 510 8 Samusik, N., Good, Z., Spitzer, M. H., Davis, K. L. & Nolan, G. P. Automated mapping  
511 of phenotype space with single-cell data. *Nature methods* **13**, 493-496 (2016).
- 512 9 Csardi, G. & Nepusz, T. The igraph software package for complex network research.  
513 *InterJournal, Complex Systems* **1695**, 1-9 (2006).
- 514 10 ggcyto: Visualize Cytometry data with ggplot. R package version 1.8.0 (2015).
- 515 11 ggthemes, Ridgeline Plots in 'ggplot2' v. 0.5.1 (2018).
- 516 12 Wickham, H. *ggplot2: Elegant Graphics for Data Analysis*. . (Springer-Verlag New York,  
517 2016).
- 518 13 Wickham, H. stringr: modern, consistent string processing. *R Journal* **2**, 38-40 (2010).
- 519 14 Hmisc: Harrell Miscellaneous (2019).
- 520 15 Kuhn, M. Building Predictive Models in R Using the caret Package. *Journal of Statistical*  
521 *Software* **28** (2008).
- 522 16 LeCun, Y. *et al.* Backpropagation Applied to Handwritten Zip Code Recognition. *Neural*  
523 *Computation* **1**, 541-551 (1989).
- 524 17 Huang, G., Liu, Z., Maaten, L. v. d. & Weinberger, K. Q. in *2017 IEEE Conference on*  
525 *Computer Vision and Pattern Recognition (CVPR)*. 2261-2269.
- 526 18 Abadi, M. *et al.* *TensorFlow : Large-Scale Machine Learning on Heterogeneous*  
527 *Distributed Systems*. (2015).
- 528 19 Oliphant, T. *A guide to NumPy*. (2006).
- 529 20 Oliphant, T. E. Python for Scientific Computing. *Computing in Science & Engineering* **9**,  
530 10-20 (2007).
- 531 21 Pedregosa, F. *et al.* Scikit-learn: Machine Learning in Python. *J. Mach. Learn. Res.* **12**,  
532 2825-2830 (2011).
- 533 22 Robinson, M. D., McCarthy, D. J. & Smyth, G. K. edgeR: a Bioconductor package for  
534 differential expression analysis of digital gene expression data. *Bioinformatics* **26**, 139-140  
535 (2010).

## Supplemental Tables

**Table S1: Features used for Clustering.** (a) Features used for morphology-based analysis. (b) Features used for functional and morphology-based analysis in phagocytosis experiment.

Table S1 (a)

| Feature ID | Feature Name_ImageMask_Channel                    | Cell Intrinsic (CI) / Cell Function (CF) | Feature description                                                             |
|------------|---------------------------------------------------|------------------------------------------|---------------------------------------------------------------------------------|
| 1          | Area_AdaptiveErode_B<br>F                         | CI                                       | Cell size                                                                       |
| 2          | Area_Intensity_SSC                                | CI                                       | Areas of SSC signal above background                                            |
| 3          | Area_Morphology_Draq5                             | CI                                       | Area of DNA signal (nuclear staining)                                           |
| 4          | Aspect.Ratio_AdaptiveErode_BF                     | CI                                       | Aspect ratio of total cell area                                                 |
| 5          | Bright.Detail.Intensity.R3_AdaptiveErode_BF_BF    | CI                                       | Intensity of brightest staining areas                                           |
| 6          | Bright.Detail.Intensity.R3_AdaptiveErode_BF_SSC   | CI                                       | Intensity of brightest signal areas                                             |
| 7          | Bright.Detail.Intensity.R3_AdaptiveErode_BF_Draq5 | CI                                       | Intensity of brightest staining areas                                           |
| 8          | Circularity_AdaptiveErode_BF                      | CI                                       | Circularity of whole cell shape                                                 |
| 9          | Circularity_Morphology_Draq5                      | CI                                       | Circularity of nucleus                                                          |
| 10         | Contrast_AdaptiveErode_BF_BF                      | CI                                       | Detects large changes in pixel values - can be measure of granularity of signal |
| 11         | Contrast_AdaptiveErode_BF_SSC                     | CI                                       | Detects large changes in pixel values - can be measure of granularity of signal |
| 12         | Diameter_AdaptiveErode_BF                         | CI                                       | Diameter of whole cell shape                                                    |
| 13         | Diameter_Morphology_Draq5                         | CI                                       | Diameter of nucleus                                                             |
| 14         | H.Energy.Mean_AdaptiveErode_BF_BF                 | CI                                       | Measure of intensity concentration - texture feature                            |
| 15         | H.Energy.Mean_Morphology_Draq5_Draq5              | CI                                       | Measure of intensity concentration - texture feature                            |
| 16         | H.Entropy.Mean_AdaptiveErode_BF_BF                | CI                                       | Measure of intensity concentration and randomness of signal - texture feature   |
| 17         | H.Entropy.Mean_Morphology_Draq5_Draq5             | CI                                       | Measure of intensity concentration and randomness of signal - texture feature   |
| 18         | Intensity_AdaptiveErode_BF_SSC                    | CI                                       | Integrated intensity of signal within whole cell mask - Cell granularity        |

|    |                                  |    |                                                                                       |
|----|----------------------------------|----|---------------------------------------------------------------------------------------|
| 19 | Intensity_AdaptiveErode_BF_Draq5 | CI | Integrated intensity of signal within whole cell mask                                 |
| 20 | Lobe.Count_Morphology_Draq5      | CI | Number of lobes of nucleus                                                            |
| 21 | Max.Pixel_Intensity_SSC          | CI | Maximum pixel intensity of stated channel within a whole cell mask - Cell granularity |
| 22 | Max.Pixel_Morphology_Draq5       | CI | Maximum pixel intensity of stated channel within a whole cell mask                    |
| 23 | Mean.Pixel_Morphology_Draq5      | CI | Mean pixel intensity of stated channel within a whole cell mask                       |
| 24 | Shape.Ratio_AdaptiveErode_BF     | CI | Minimum thickness divided by length - measure of cell shape characteristic            |
| 25 | Std.Dev_AdaptiveErode_BF         | CI | Standard deviation of BF signal - measure of granularity and variance in BF           |

Table S1 (b)

| Feature ID | Feature Name_ImageMask_Channel                    | Cell Intrinsic (CI) / Cell Function (CF) | Feature description                   |
|------------|---------------------------------------------------|------------------------------------------|---------------------------------------|
| 1          | Area_AdaptiveErode_BF                             | CI                                       | Cell size                             |
| 2          | Area_Intensity_DHR                                | CF                                       | Area of DHR staining above background |
| 3          | Area_Intensity_Bac                                | CF                                       | Area of CTV staining above background |
| 4          | Area_Intensity_SSC                                | CI                                       | Areas of SSC signal above background  |
| 5          | Area_Morphology_DNA                               | CI                                       | Area of DNA signal (nuclear staining) |
| 6          | Aspect.Ratio_AdaptiveErode_BF                     | CI                                       | Aspect ratio of total cell area       |
| 7          | Bright.Detail.Intensity.R3_AdaptiveErode_BF_Bac   | CF                                       | Intensity of brightest staining areas |
| 8          | Bright.Detail.Intensity.R3_AdaptiveErode_BF_BF    | CI                                       | Intensity of brightest staining areas |
| 9          | Bright.Detail.Intensity.R3_AdaptiveErode_BF_DHR   | CF                                       | Intensity of brightest staining areas |
| 10         | Bright.Detail.Intensity.R3_AdaptiveErode_BF_Draq5 | CI                                       | Intensity of brightest staining areas |
| 11         | Bright.Detail.Intensity.R3_AdaptiveErode_BF_SSC   | CI                                       | Intensity of brightest signal areas   |
| 12         | Circularity_AdaptiveErode_BF                      | CI                                       | Circularity of whole cell shape       |

|    |                                      |    |                                                                                       |
|----|--------------------------------------|----|---------------------------------------------------------------------------------------|
| 13 | Circularity_Morphology_DNA           | CI | Circularity of nucleus                                                                |
| 14 | Contrast_AdaptiveErode_BF_BF         | CI | Detects large changes in pixel values - can be measure of granularity of signal       |
| 15 | Contrast_AdaptiveErode_BF_SSC        | CI | Detects large changes in pixel values - can be measure of granularity of signal       |
| 16 | Diameter_AdaptiveErode_BF            | CI | Diameter of whole cell shape                                                          |
| 17 | Diameter_Morphology_Draq5            | CI | Diameter of nucleus                                                                   |
| 18 | H.Energy.Mean_AdaptiveErode_BF_BF    | CI | Measure of intensity concentration - texture feature                                  |
| 19 | H.Energy.Mean_Intensity_DHR_DHR      | CF | Measure of intensity concentration - texture feature                                  |
| 20 | H.Energy.Mean_Intensity_Bac_Bac      | CF | Measure of intensity concentration - texture feature                                  |
| 21 | H.Energy.Mean_Morphology_Draq5_Draq5 | CI | Measure of intensity concentration - texture feature                                  |
| 22 | H.Entropy.Mean_AdaptiveErode_BF_BF   | CI | Measure of intensity concentration and randomness of signal - texture feature         |
| 23 | H.Entropy.Mean_Intensity_DHR_DHR     | CF | Measure of intensity concentration and randomness of signal - texture feature         |
| 24 | H.Entropy.Mean_Intensity_Bac_Bac     | CF | Measure of intensity concentration and randomness of signal - texture feature         |
| 25 | H.Entropy.Mean_Morphology_DNA_Draq5  | CI | Measure of intensity concentration and randomness of signal - texture feature         |
| 26 | Intensity_AdaptiveErode_BF_Bac       | CF | Integrated intensity of signal within whole cell mask                                 |
| 27 | Intensity_AdaptiveErode_BF_DHR       | CF | Integrated intensity of signal within whole cell mask                                 |
| 28 | Intensity_AdaptiveErode_BF_Draq5     | CI | Integrated intensity of signal within whole cell mask                                 |
| 29 | Intensity_AdaptiveErode_BF_SSC       | CI | Integrated intensity of signal within whole cell mask - Cell granularity              |
| 30 | Lobe.Count_Morphology_Draq5          | CI | Number of lobes of nucleus                                                            |
| 31 | Max.Pixel_Intensity_Bac              | CF | Maximum pixel intensity of stated channel within a whole cell mask                    |
| 32 | Max.Pixel_Intensity_SSC              | CF | Maximum pixel intensity of stated channel within a whole cell mask - Cell granularity |
| 33 | Max.Pixel_Morphology_Draq5           | CI | Maximum pixel intensity of stated channel within a whole cell mask                    |
| 34 | Mean.Pixel_Morphology_Draq5          | CI | Mean pixel intensity of stated channel within a whole cell mask                       |
| 35 | Shape.Ratio_AdaptiveErode_BF         | CI | Minimum thickness divided by length - measure of cell shape characteristic            |
| 36 | Std.Dev_AdaptiveErode_BF             | CI | Standard deviation of BF signal - measure of granularity and variance in BF           |

**Table S2: Results of negative binomial regression analysis comparing clusters from zebrafish phagocytosis (Cells + CTV *S. aureus*) with CCB inhibition control (Cells + CTV *S. aureus* + CCB)**

| Cluster ID | logFC    | logCPM   | LR       | PValue   | FDR      |
|------------|----------|----------|----------|----------|----------|
| Dr1        | -2.48673 | 14.76127 | 24.65067 | 6.87E-07 | 1.19E-06 |
| Dr2        | -3.8209  | 15.11433 | 30.32912 | 3.65E-08 | 7.03E-08 |
| Dr3        | -2.63248 | 15.10065 | 30.25504 | 3.79E-08 | 7.03E-08 |
| Dr5        | -2.7606  | 14.21908 | 33.0875  | 8.81E-09 | 1.91E-08 |
| Dr6        | -2.70177 | 13.37119 | 36.16033 | 1.82E-09 | 4.73E-09 |
| Dr7        | -2.72126 | 14.24771 | 34.08437 | 5.28E-09 | 1.25E-08 |
| Dr8        | 4.482713 | 14.88169 | 82.05466 | 1.32E-19 | 4.92E-19 |
| Dr10       | -3.45902 | 14.60211 | 24.35992 | 7.99E-07 | 1.30E-06 |
| Dr11       | 6.904763 | 13.9128  | 84.08534 | 4.74E-20 | 2.05E-19 |
| Dr12       | 1.087279 | 12.83107 | 11.29997 | 0.000775 | 0.001061 |
| Dr13       | 1.514425 | 12.94985 | 11.48213 | 0.000703 | 0.001015 |
| Dr14       | -2.99602 | 11.50543 | 42.88105 | 5.82E-11 | 1.68E-10 |
| Dr15       | -2.38678 | 12.70026 | 21.12804 | 4.30E-06 | 6.57E-06 |
| Dr16       | 5.663379 | 14.13744 | 143.1863 | 5.35E-33 | 1.39E-31 |
| Dr17       | 5.715121 | 14.80998 | 122.2704 | 2.01E-28 | 2.62E-27 |
| Dr19       | 4.077533 | 14.85917 | 93.86068 | 3.39E-22 | 1.76E-21 |
| Dr20       | 3.847921 | 13.05544 | 49.27037 | 2.23E-12 | 7.25E-12 |
| Dr21       | 1.571314 | 11.87021 | 9.421178 | 0.002145 | 0.002788 |
| Dr23       | 4.375929 | 16.67274 | 99.99839 | 1.53E-23 | 9.91E-23 |
| Dr25       | 5.769772 | 13.99753 | 119.3218 | 8.90E-28 | 7.72E-27 |

**Table S3: Results of negative binomial regression analysis comparing clusters from zebrafish phagocytosis (Cells + CTV *S. aureus*) with ice inhibition control (Cells + CTV *S. aureus* + ice)**

| Cluster ID | logFC    | logCPM   | LR       | PValue   | FDR      |
|------------|----------|----------|----------|----------|----------|
| Dr1        | -2.57222 | 14.76127 | 26.21074 | 3.06E-07 | 2.65E-06 |
| Dr3        | -1.47929 | 15.10065 | 10.27905 | 0.001345 | 0.004998 |
| Dr5        | 1.235565 | 14.21908 | 6.9584   | 0.008343 | 0.023708 |
| Dr6        | -1.96681 | 13.37119 | 19.93869 | 8.00E-06 | 5.20E-05 |
| Dr7        | -1.93868 | 14.24771 | 18.19453 | 1.99E-05 | 0.000104 |
| Dr9        | 4.340935 | 11.68675 | 36.21393 | 1.77E-09 | 4.60E-08 |
| Dr12       | 0.836382 | 12.83107 | 6.799505 | 0.009118 | 0.023708 |
| Dr14       | -2.35912 | 11.50543 | 26.47869 | 2.66E-07 | 2.65E-06 |
| Dr15       | -1.67916 | 12.70026 | 10.80552 | 0.001012 | 0.004385 |
| Dr24       | 1.081904 | 16.03192 | 8.340688 | 0.003877 | 0.012599 |

**Table S4: Results of negative binomial regression analysis comparing clusters from apple snail phagocytosis (Cells + CTV *S. aureus*) with EDTA inhibition control (Cells + CTV *S. aureus* + EDTA)**

| Cluster ID | logFC    | logCPM   | LR       | PValue   | FDR      |
|------------|----------|----------|----------|----------|----------|
| 27426      | 1.219719 | 16.42389 | 23.86393 | 1.03E-06 | 4.14E-06 |
| 27427      | 1.521304 | 16.31424 | 23.42745 | 1.30E-06 | 4.32E-06 |
| 27430      | 3.506921 | 11.96025 | 19.19534 | 1.18E-05 | 2.62E-05 |
| 27431      | 2.000616 | 13.66811 | 21.45211 | 3.63E-06 | 9.07E-06 |
| 27432      | 1.178448 | 15.71918 | 15.65951 | 7.58E-05 | 0.000152 |
| 27433      | 0.912203 | 14.51336 | 5.608834 | 0.01787  | 0.023827 |
| 27434      | 1.919568 | 14.24789 | 21.7377  | 3.13E-06 | 8.93E-06 |
| 27435      | -0.95771 | 16.55159 | 15.15146 | 9.92E-05 | 0.00018  |
| 27436      | -2.21453 | 17.04466 | 66.60728 | 3.31E-16 | 6.63E-15 |
| 27437      | 1.920223 | 13.48376 | 27.01612 | 2.02E-07 | 1.01E-06 |
| 27438      | 1.155857 | 13.78276 | 11.69042 | 0.000628 | 0.000967 |
| 27439      | 1.742058 | 17.721   | 51.24411 | 8.16E-13 | 5.44E-12 |
| 27441      | 1.645859 | 13.23961 | 10.80603 | 0.001012 | 0.001445 |
| 27442      | 3.134689 | 13.98527 | 55.58824 | 8.94E-14 | 8.94E-13 |
| 27445      | -0.82885 | 16.67206 | 12.56812 | 0.000392 | 0.000654 |

**Table S5: Results of negative binomial regression analysis comparing clusters from apple snail phagocytosis (Cells + CTV *S. aureus*) with ice inhibition control (Cells + CTV *S. aureus* + ice)**

| Cluster ID | logFC    | logCPM   | LR       | PValue   | FDR      |
|------------|----------|----------|----------|----------|----------|
| 27442      | 2.500366 | 13.98527 | 37.29469 | 1.02E-09 | 2.03E-08 |
